# Supplementary material
Source: PubMed Central journal article supplement (PMC3037650)
Supplement: supp_M110.171702_jbc.M110.171702-1.pdf [file supp_M110.171702_jbc.M110.171702-1.pdf]

Supplemental FIGURE S1

Co-localization of Rab27a-T23N (GDP-bound form) with Coronin1A

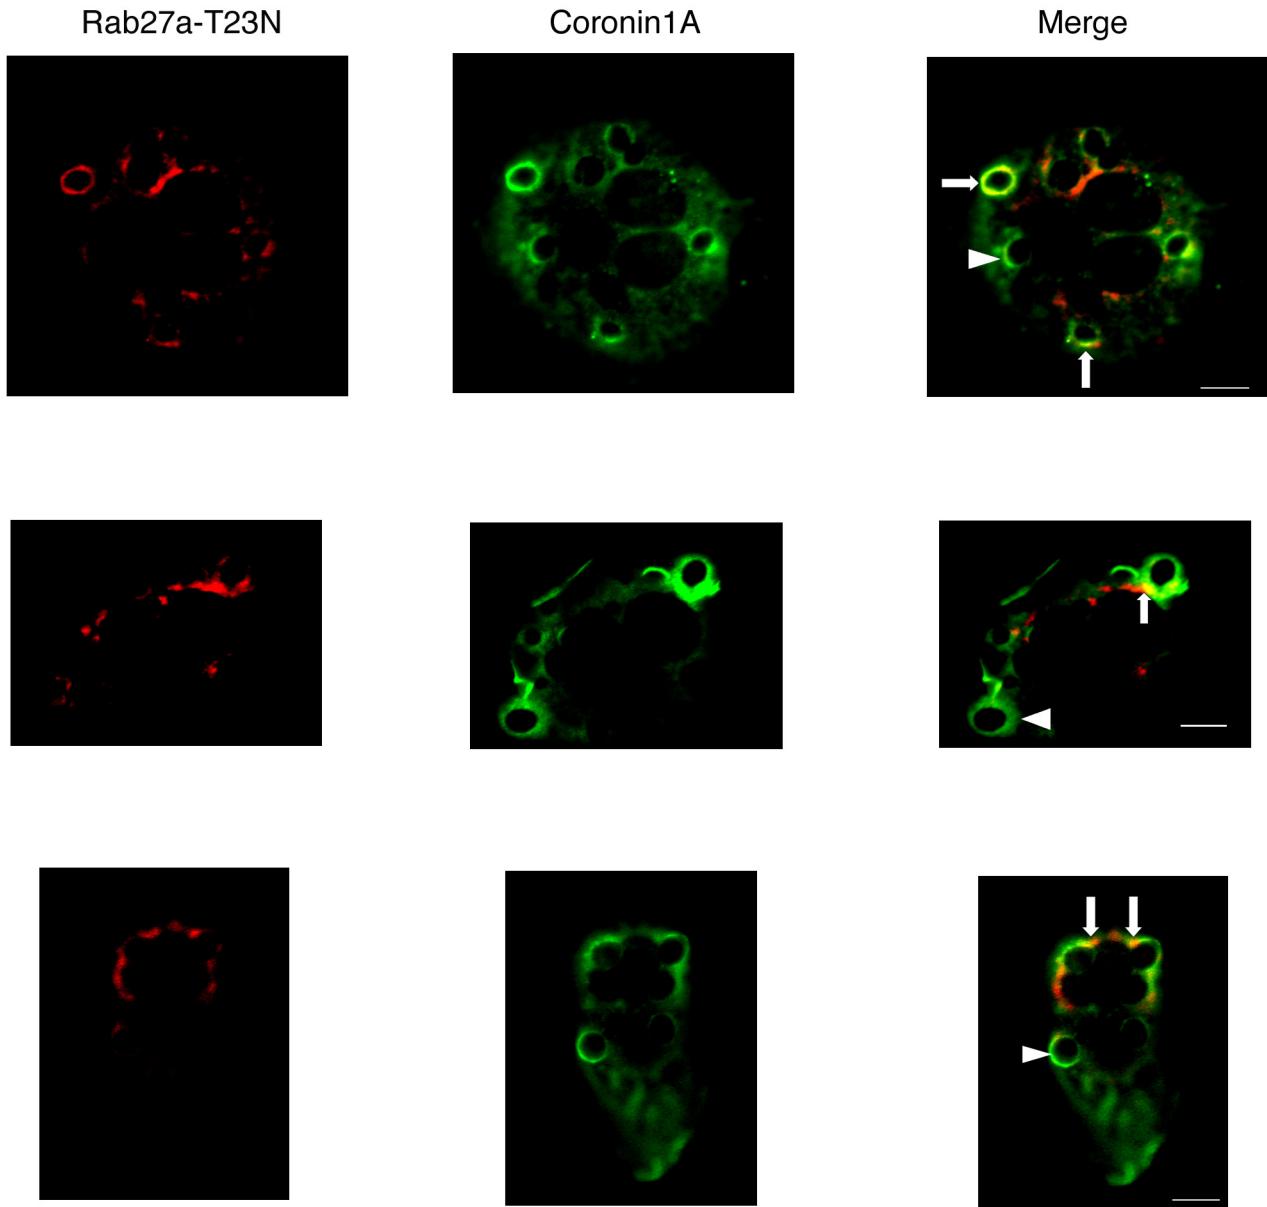

Co-staining of Coronin1A (Green fluorescence) and transiently expressed Flag-tagged Rab27a-T23N (GDP-bound form) visualized by Cy3-conjugated anti-Flag (Red fluorescence) in shRNA-Rab27a/HL cells (clone 1) after phagocytosis assay

Scale bars show 10 $\mu$ m

Arrows indicate phagosomes surrounded by Coronin1A and Rab27a-T23N

Arrowheads indicate phagosomes surrounded by Coronin1A but not by Rab27a
