# Supplementary material
Source: PubMed Central journal article supplement (PMC3037650)
Supplement: supp_M110.171702_jbc.M110.171702-2.pdf [file supp_M110.171702_jbc.M110.171702-2.pdf]

Supplemental FIGURE S2

shRNA-Coronin1A delayed disassembly of F-actin around phagosomes

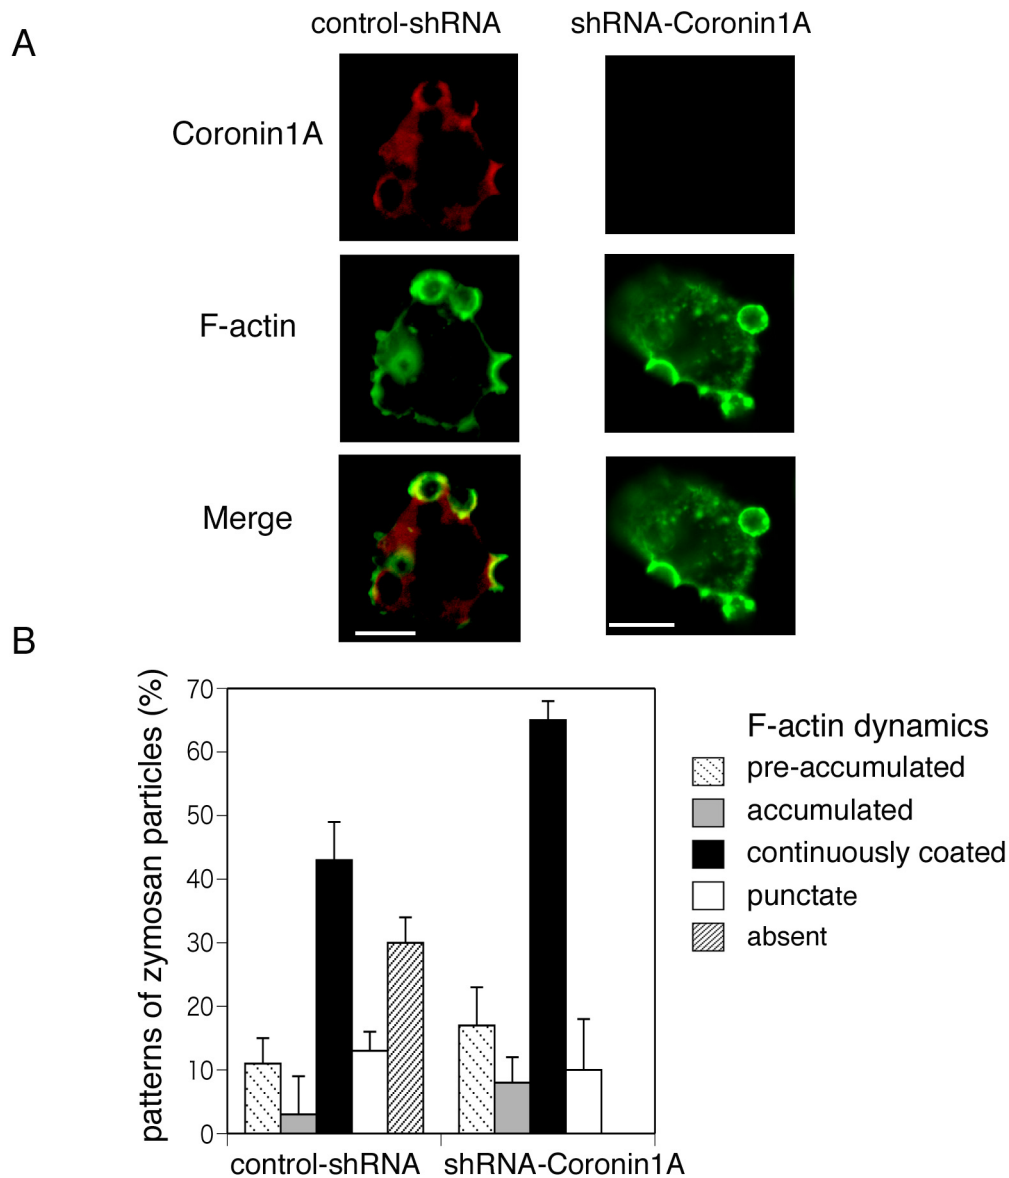

To inhibit Coronin1A gene expression, a vector for short hairpin RNA (shRNA) incorporated in pLKO.1-puro (Sigma-Aldrich, Mission shRNA code: TRCN 0000029339) or non-target shRNA control vector (Sigma-Aldrich, Mission) was transfected into HL60 cells by lentiviral system.

Phagocytosis assay was performed using C3bi-labeled zymosan for 10 min and treated cells were washed with PBS and further incubated for 30 min.

**A**, Cells were stained with anti-Coronin1A mAb and AlexaFluor 488-conjugated phalloidin.

In the case of control-shRNA (left panel), several zymosan particles were already incorporated deeply inside the cell (the dark area within the cell) but not in the case of shRNA-Coronin1A (right panel).

Scale bars show 10 $\mu$ m.

**B** Each zymosan particle was classified into five stages according to F-actin dynamics .

More than 50 zymosan particles were classified into five stages and the proportion of the stages was calculated. The data are the mean with SD from three independent experiments.
